# Supplementary material for: Avian raptors are indicator species and victims of high pathogenicity avian influenza virus HPAIV H5N1 (clade 2.3.4.4b) in Germany
Source: PubMed Central journal article supplement (PMC11579473; doi:10.1038/s41598-024-79930-x), 2024-11-20
Supplement: 41598_2024_79930_MOESM2_ESM.pdf [file 41598_2024_79930_MOESM2_ESM.pdf]

### Figure legend of Supplemental Figure 1a, 1b and 1c

Median-joining network for concatenated whole genome HPAIV H5 sequences of genotypes (1a) Ger-10-21-N1.2 (corresponding to European genotype "C"), (1b) Ger-10-21-N1.5 (corresponding to European genotype "AB") and (1c) Ger-10-21-N1.5 (corresponding to European genotype "AB"). Sequences are represented by circles, colored as indicated in the legend according to their host group of origin. The diameter of the circle indicates the number of identical sequences represented. Vertical dashes along the network edges reflect mutational steps separating the sequences. Uncolored nodes refer to unsampled and therefore unknown intermediate sequences as estimated by the clustering algorithm. Clusters with at least one raptor sample (red dot) are highlighted in grey and labelled with consecutive Roman numbers. HPAIV H5 sequences from raptor species are labelled with the name of the host species (as provided), the year of sample collection and the EpiFlu accession number. The data underlying the figure are summarized in Supplementary Tables 5 and 6.

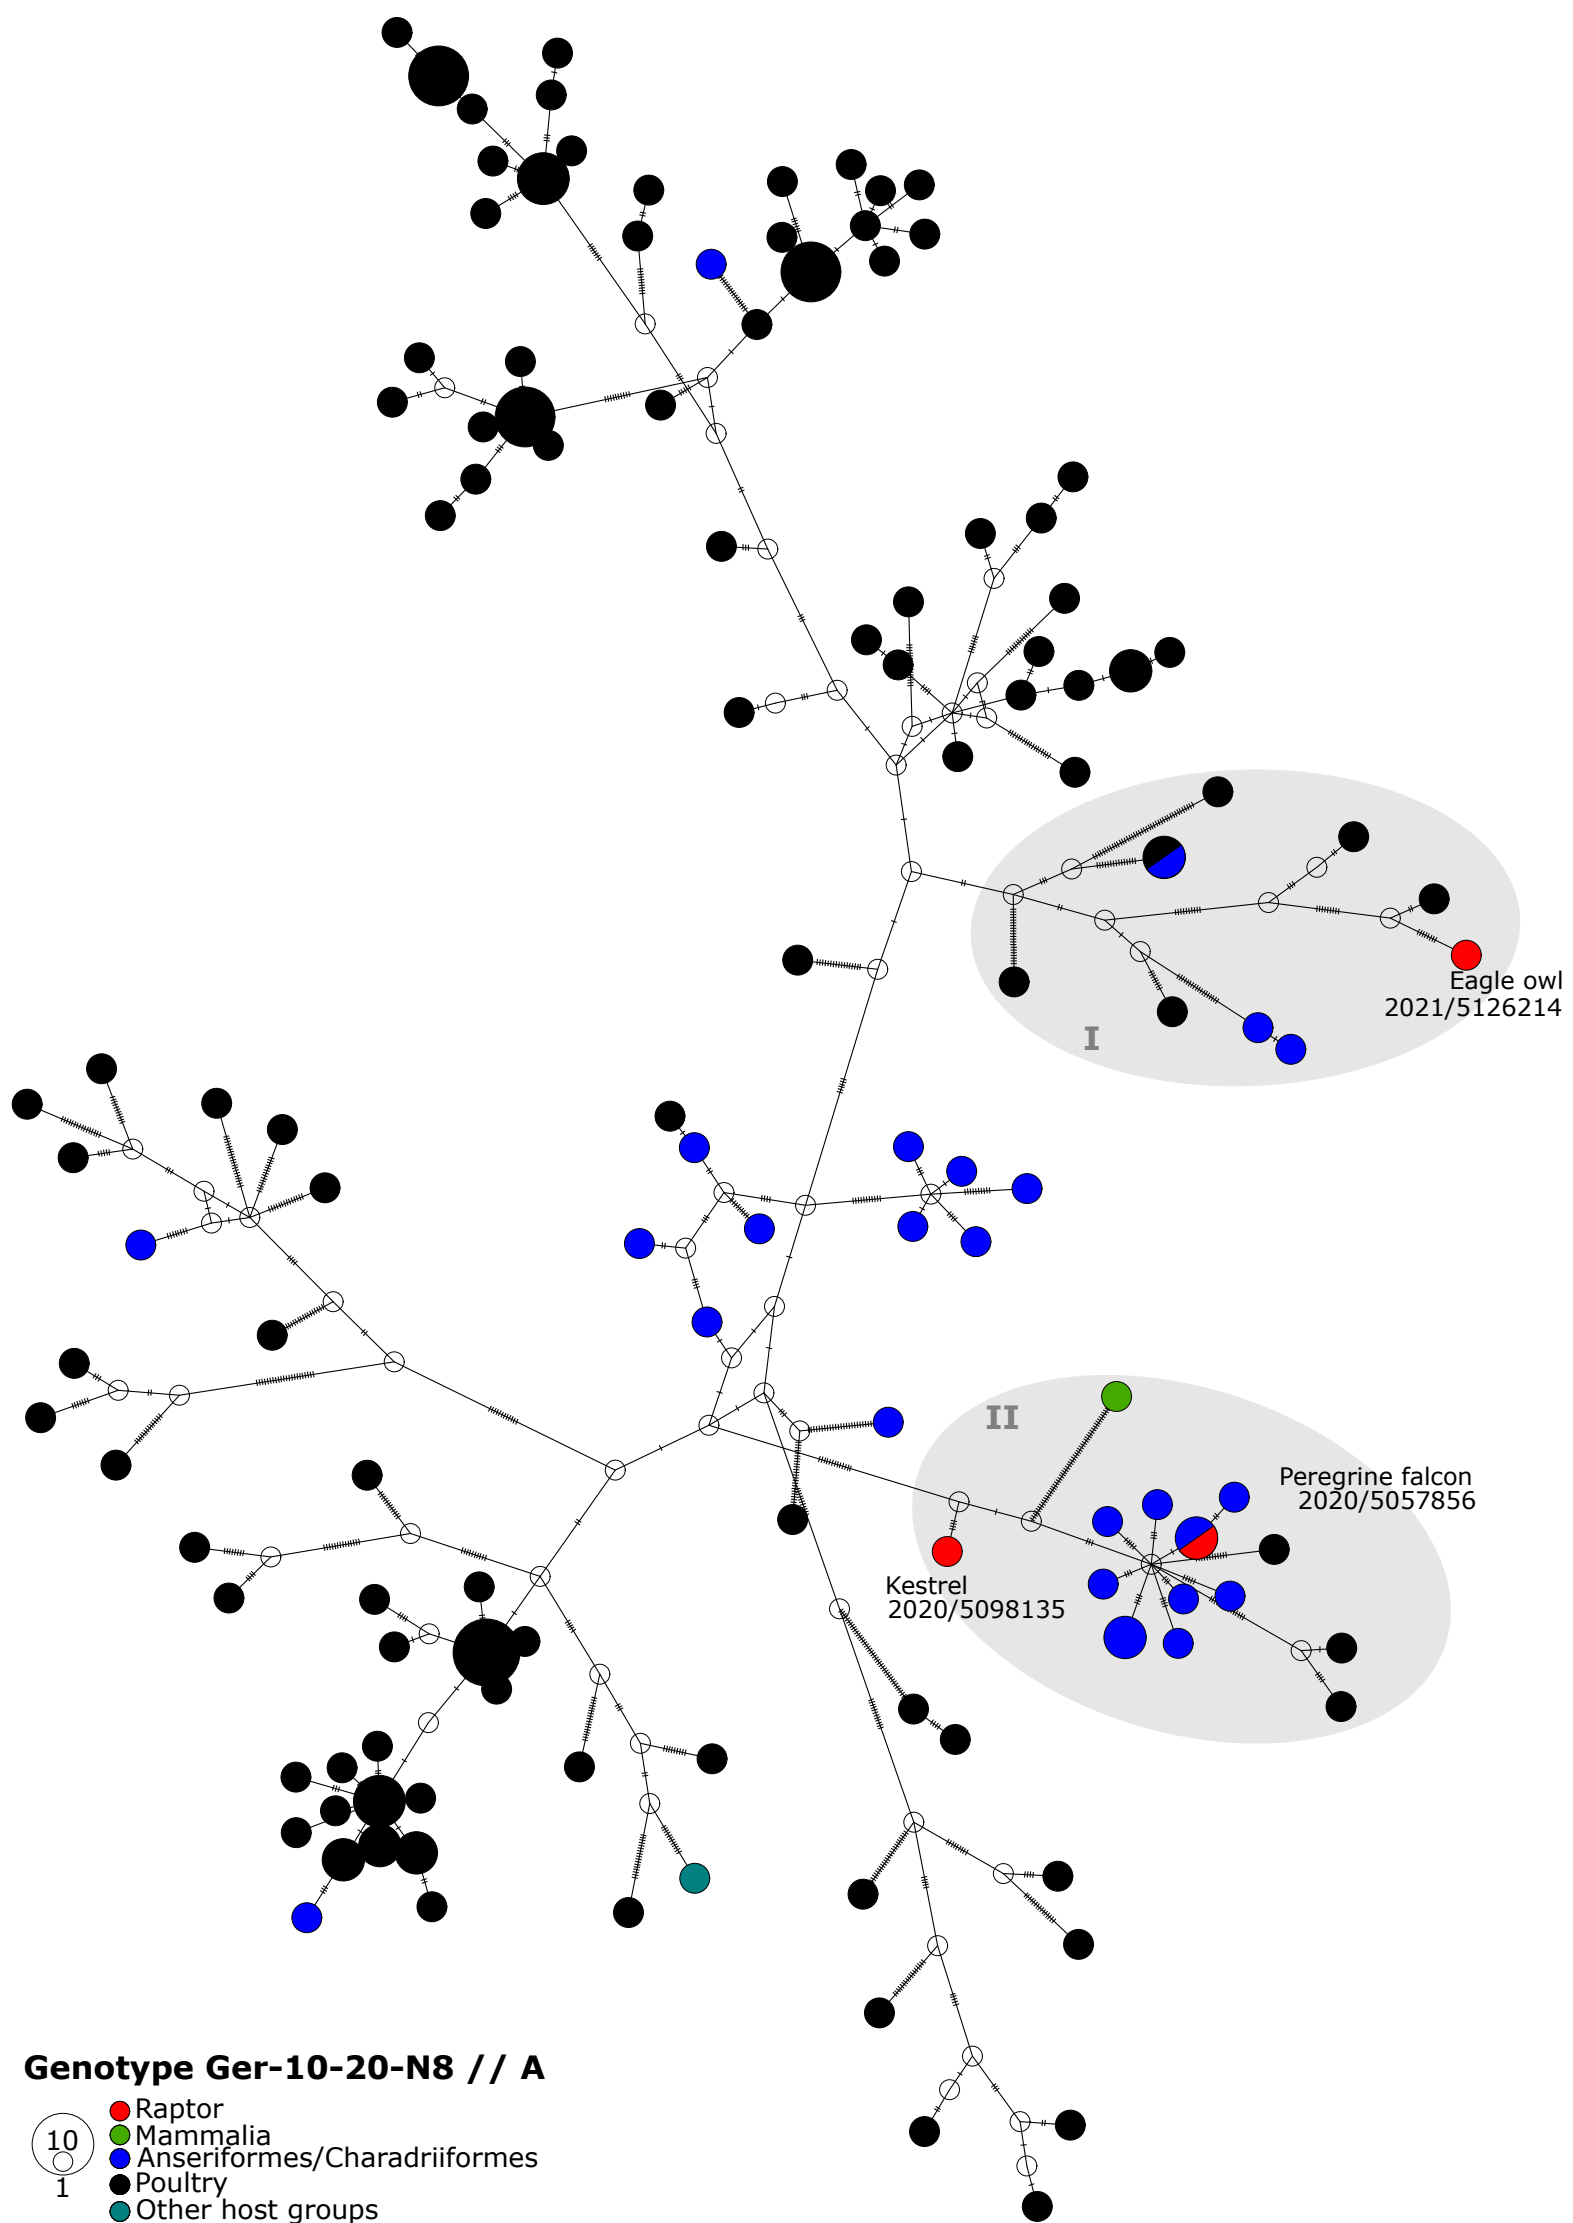

Eagle owl  
2021/5126214

I

Peregrine falcon  
2020/5057856

Kestrel  
2020/5098135

II

**Genotype Ger-10-20-N8 // A**

- Raptor
- Mammalia
- Anseriformes/Charadriiformes
- Poultry
- Other host groups

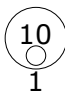

# Genotype Ger-10-21-N1.2 // C

- Raptor
  - Mammalia
  - Anseriformes/Charadriiformes
  - Poultry
  - Other host groups
- 10  
1

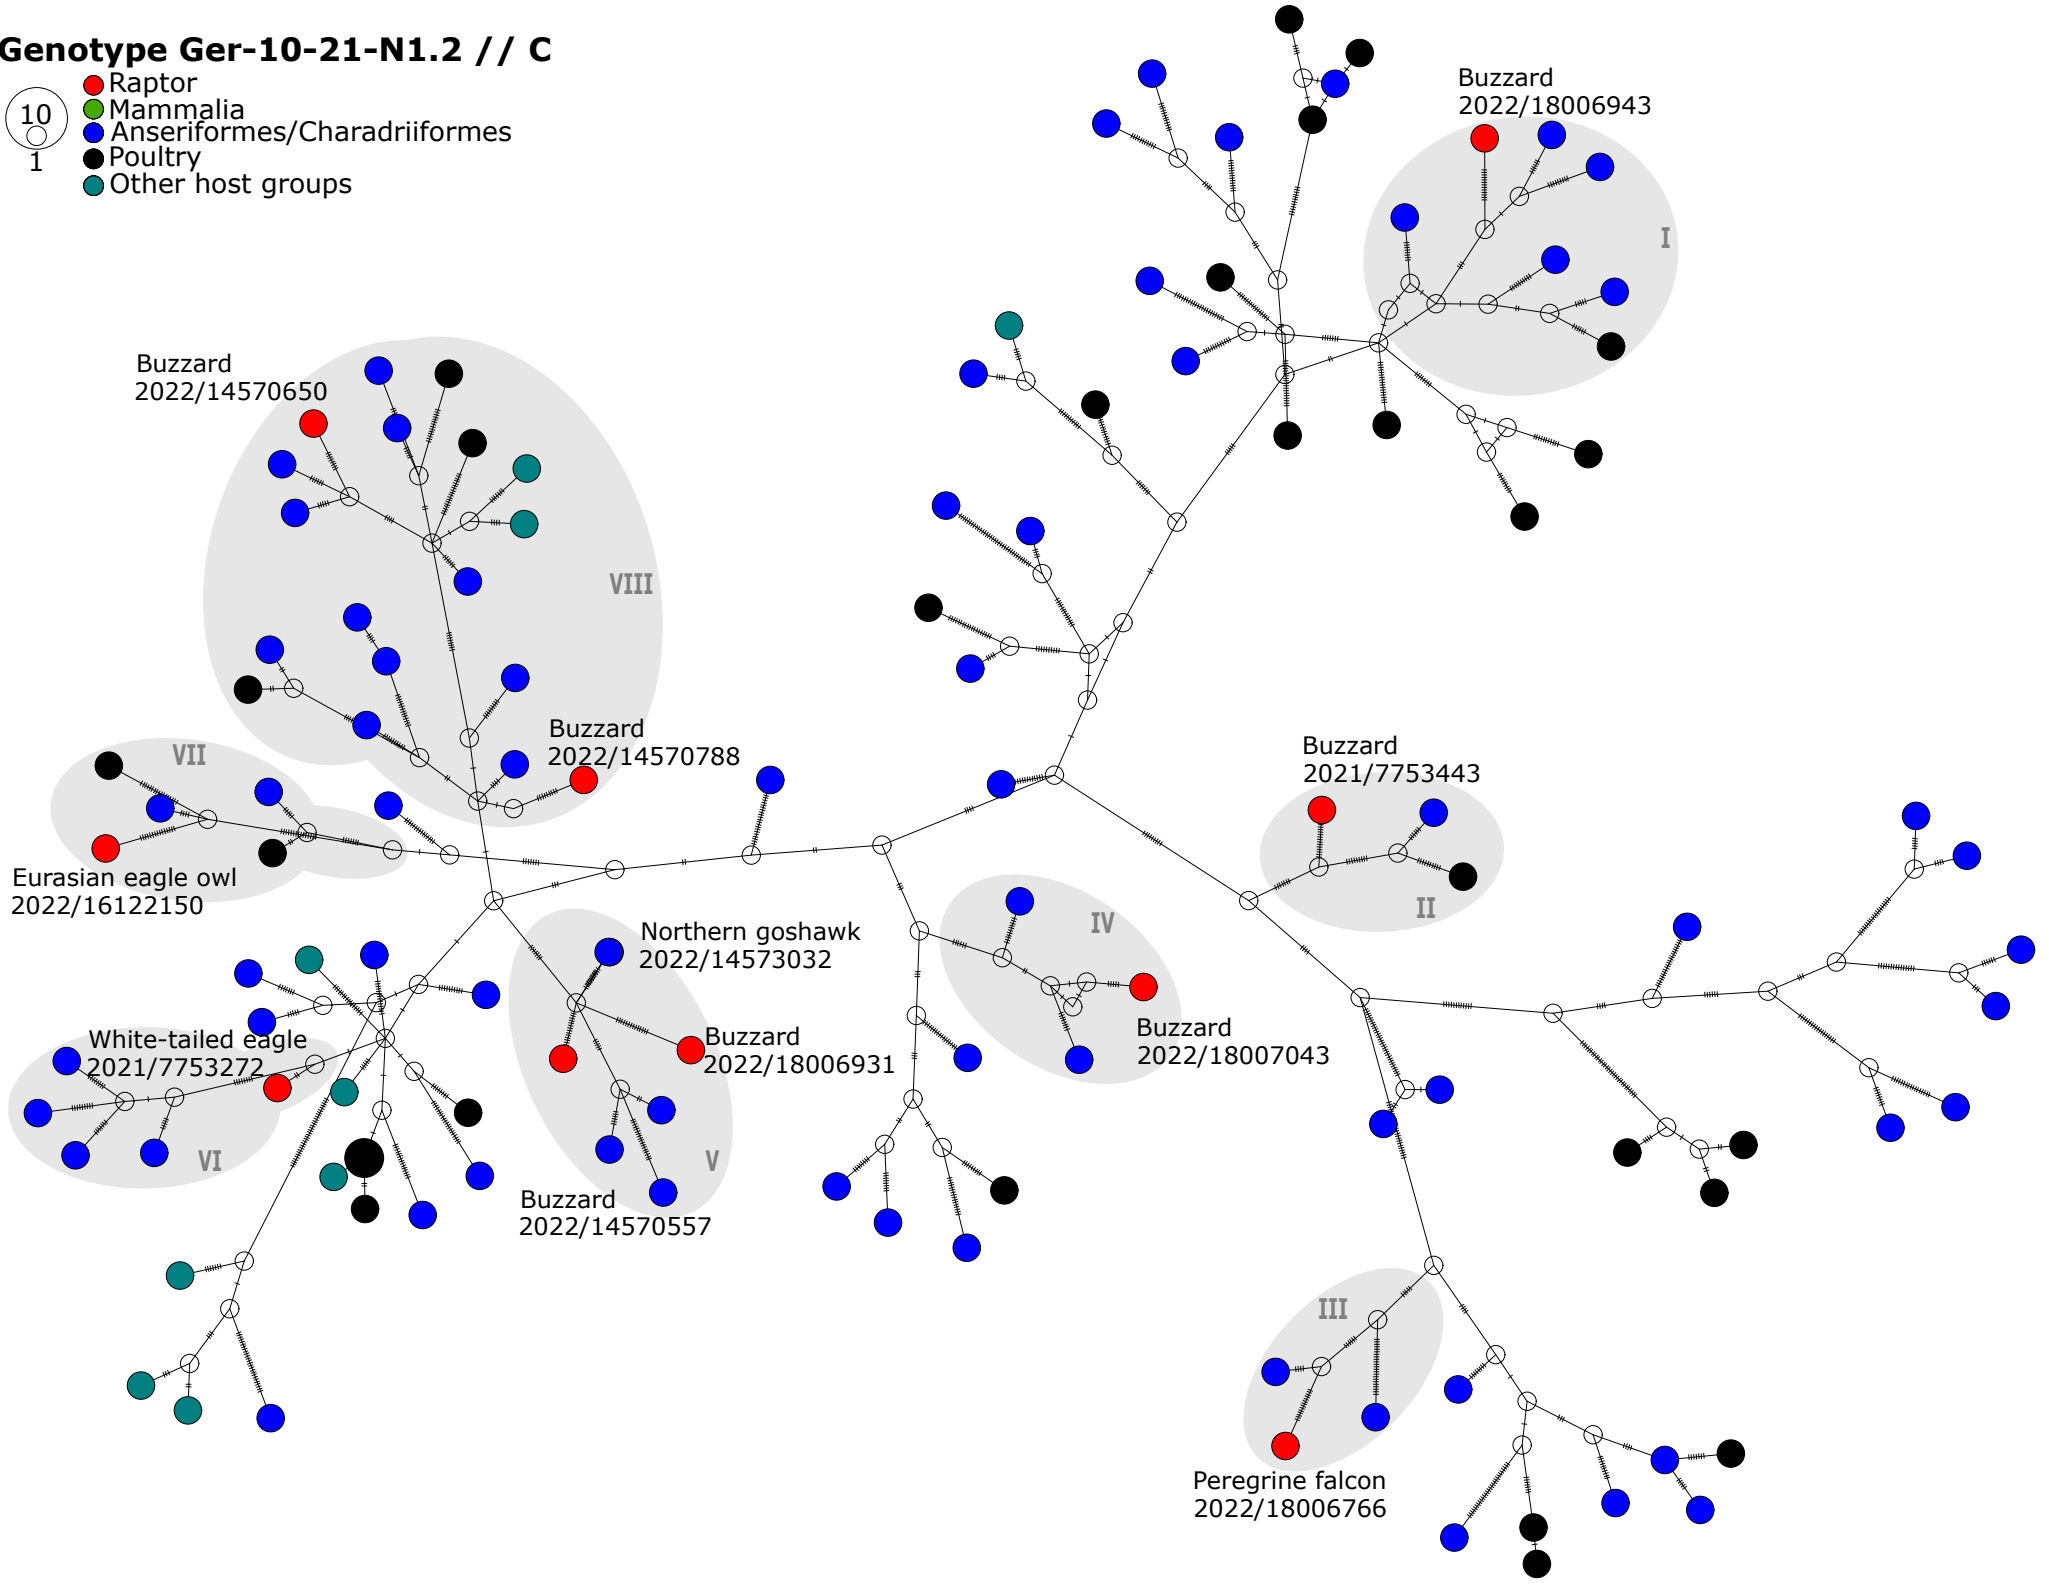

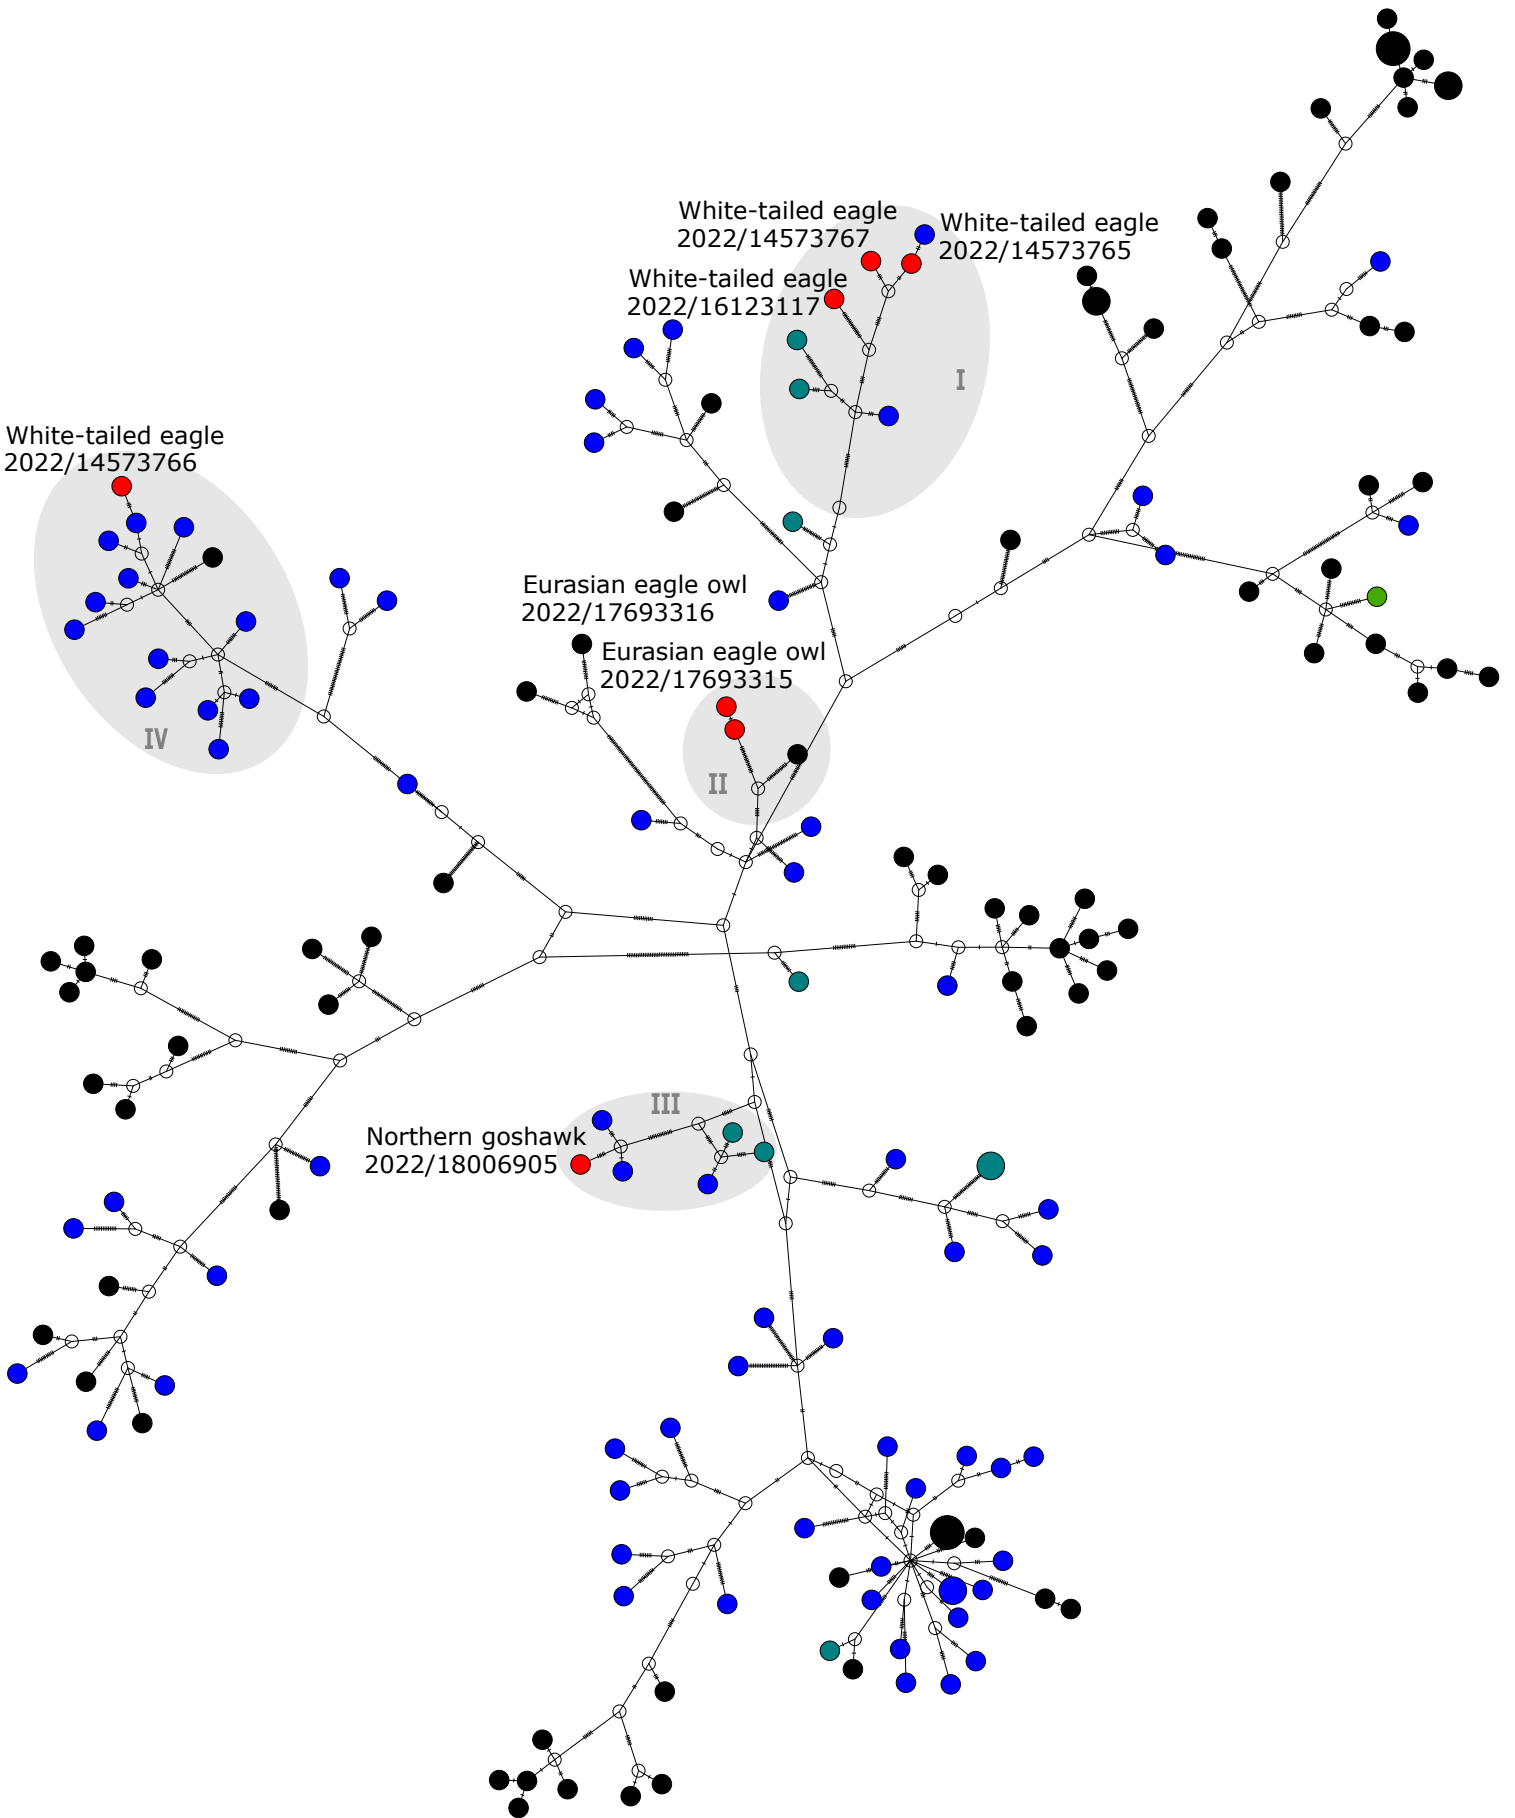

**Genotype Ger-10-21-N1.5 // AB**

- Raptor
  - Mammalia
  - Anseriformes/Charadriiformes
  - Poultry
  - Other host groups
- 10  
○  
1
